# Supplementary material
Source: PubMed Central journal article supplement (PMC8971277)
Supplement: mmc1.pdf [file mmc1.pdf]

# THE LANCET

## Infectious Diseases

### Supplementary appendix

This appendix formed part of the original submission and has been peer reviewed. We post it as supplied by the authors.

Supplement to: Cerqueira-Silva T, Andrews JR, Boaventura VS, et al. Effectiveness of CoronaVac, ChAdOx1 nCoV-19, BNT162b2, and Ad26.COV2.S among individuals with previous SARS-CoV-2 infection in Brazil: a test-negative, case-control study. *Lancet Infect Dis* 2022; published online March 31. [https://doi.org/10.1016/S1473-3099\(22\)00140-2](https://doi.org/10.1016/S1473-3099(22)00140-2).

## Supplementary Appendix: Effectiveness of CoronaVac, ChAdOx1, BNT162b2 and Ad26.COVS.2 among individuals with prior SARS-CoV-2 infection in Brazil

|                                                                                                                                                                                                  |    |
|--------------------------------------------------------------------------------------------------------------------------------------------------------------------------------------------------|----|
| Table A1. Characteristics and distribution of individuals according to vaccination status.                                                                                                       | 2  |
| Table A2. Vaccine effectiveness among recently vaccinated individuals (0 to 6 days and 7 to 13 days post first dose).                                                                            | 4  |
| Table A3. Vaccine effectiveness $\geq 14$ days after series completion against symptomatic COVID-19 by subgroup.                                                                                 | 5  |
| Table A4. Vaccine effectiveness $\geq 14$ days after series completion against severe outcomes by subgroup.                                                                                      | 5  |
| Table A5- Estimates for covariates from models for estimating vaccine effectiveness.                                                                                                             | 6  |
| Table A6- Sensitivity analyses with different matching criteria*. Vaccine effectiveness against symptomatic COVID-19                                                                             | 7  |
| Table A7- Sensitivity analyses with different matching criteria*. Vaccine effectiveness against COVID-19 related hospitalisation or death                                                        | 8  |
| Figure A1 Cumulative proportion of the population receiving each vaccine, by age group.                                                                                                          | 10 |
| Figure A2. Prevalence of SARS-CoV-2 variants of concern in Brazil from January 01, 2021, to November, 30, 2021, stratified by region. Data obtained from the Fiocruz Genomic Network and GISAID. | 11 |
| Figure A3. Time elapsed between the first (gray) or second (orange) dose and RT-PCR test among vaccinated people who had a prior SARS-CoV-2 infection. A dashed line is shown at 90 days.        | 12 |
| Figure A4. Number of enrolled discordant case-control pairs by date of RT-PCR testing during the study period between January 18 and November 11, 2021.                                          | 12 |
| Figure A5. Week of vaccination for AD26.COVS.2, ChAdOx1, BNT162b2 and CoronaVac among matched participants.                                                                                      | 14 |
| <b>Supplementary Information on Data Sources and Linkage</b>                                                                                                                                     | 15 |

**Table A1. Characteristics and distribution of individuals according to vaccination status.**

| Characteristic                                                                | Unvaccinated               |                            | AD26.COVS           |                        | ChAdOx1                |                            | BNT162b2               |                         | CoronaVac              |                            |
|-------------------------------------------------------------------------------|----------------------------|----------------------------|---------------------|------------------------|------------------------|----------------------------|------------------------|-------------------------|------------------------|----------------------------|
|                                                                               | Case,<br>N = 14,566        | Control,<br>N = 83,290     | Case,<br>N = 155    | Control,<br>N = 1,137  | Case,<br>N = 3,114     | Control,<br>N = 23,465     | Case,<br>N = 994       | Control,<br>N = 8,289   | Case,<br>N = 3,737     | Control,<br>N = 28,874     |
| <b>Individuals</b>                                                            | 14,566<br>(100.0)          | 36,709<br>(44.1)           | 155 (100.0)         | 722 (63.5)             | 3,114<br>(100.0)       | 12,783 (54.5)              | 994 (100.0)            | 4,941 (59.6)            | 3,737<br>(100.0)       | 13,271<br>(46.0)           |
| <b>Age (years),<br/>median (IQR)</b>                                          | 35 (28 – 43)               | 35 (28 – 42)               | 40 (34 – 44)        | 40 (37 – 44)           | 42 (34 – 53)           | 40 (33 – 49)               | 37 (28 – 45)           | 36 (28 – 44)            | 39 (31 – 49)           | 37 (31 – 45)               |
| <b>Sex, female</b>                                                            | 8,287<br>(56.9)            | 48,630<br>(58.4)           | 87 (56.1)           | 647 (56.9)             | 1,978 (63.5)           | 15,569 (66.3)              | 574 (57.7)             | 5,061 (61.1)            | 2,705 (72.4)           | 21,024<br>(72.8)           |
| <b>Race</b>                                                                   |                            |                            |                     |                        |                        |                            |                        |                         |                        |                            |
| White                                                                         | 6,484<br>(44.5)            | 38,170<br>(45.8)           | 69 (44.5)           | 570 (50.1)             | 1,496 (48.0)           | 11,471 (48.9)              | 451 (45.4)             | 3,669 (44.3)            | 1,802 (48.2)           | 13,523<br>(46.8)           |
| Mixed                                                                         | 5,234<br>(35.9)            | 29,655<br>(35.6)           | 59 (38.1)           | 343 (30.2)             | 1,034 (33.2)           | 7,616 (32.5)               | 361 (36.3)             | 2,963 (35.7)            | 1,310 (35.1)           | 10,211<br>(35.4)           |
| Black                                                                         | 676 (4.6)                  | 4,084 (4.9)                | 9 (5.8)             | 62 (5.5)               | 145 (4.7)              | 1,367 (5.8)                | 46 (4.6)               | 465 (5.6)               | 176 (4.7)              | 1,594 (5.5)                |
| Indigenous/Asian<br>(Missing)                                                 | 1,050 (7.2)<br>1,122 (7.7) | 5,461 (6.6)<br>5,920 (7.1) | 7 (4.5)<br>11 (7.1) | 35 (3.1)<br>127 (11.2) | 139 (4.5)<br>300 (9.6) | 1,158 (4.9)<br>1,853 (7.9) | 29 (2.9)<br>107 (10.8) | 333 (4.0)<br>859 (10.4) | 212 (5.7)<br>237 (6.3) | 1,764 (6.1)<br>1,782 (6.2) |
| <b>Region of<br/>residence</b>                                                |                            |                            |                     |                        |                        |                            |                        |                         |                        |                            |
| Central-west                                                                  | 1,357 (9.3)                | 6,861 (8.2)                | 19 (12.3)           | 167 (14.7)             | 414 (13.3)             | 2,808 (12.0)               | 123 (12.4)             | 991 (12.0)              | 389 (10.4)             | 2,170 (7.5)                |
| North                                                                         | 1,333 (9.2)                | 8,208 (9.9)                | 8 (5.2)             | 39 (3.4)               | 183 (5.9)              | 1,216 (5.2)                | 87 (8.8)               | 628 (7.6)               | 259 (6.9)              | 2,281 (7.9)                |
| Northeast                                                                     | 3,447<br>(23.7)            | 17,379<br>(20.9)           | 29 (18.7)           | 111 (9.8)              | 652 (20.9)             | 4,541 (19.4)               | 183 (18.4)             | 1,225 (14.8)            | 986 (26.4)             | 7,233 (25.1)               |
| South                                                                         | 1,358 (9.3)                | 8,975 (10.8)               | 21 (13.5)           | 157 (13.8)             | 236 (7.6)              | 2,205 (9.4)                | 97 (9.8)               | 1,007 (12.1)            | 279 (7.5)              | 2,401 (8.3)                |
| Southeast                                                                     | 7,071<br>(48.5)            | 41,867<br>(50.3)           | 78 (50.3)           | 663 (58.3)             | 1,629 (52.3)           | 12,695 (54.1)              | 504 (50.7)             | 4,438 (53.5)            | 1,824 (48.8)           | 14,789<br>(51.2)           |
| <b>Residence in<br/>State Capital</b>                                         | 5,551<br>(38.1)            | 42,336<br>(50.8)           | 54 (34.8)           | 522 (45.9)             | 1,227 (39.4)           | 11,967 (51.0)              | 439 (44.2)             | 4,766 (57.5)            | 1,711 (45.8)           | 17,607<br>(61.0)           |
| <b>Pregnancy<br/>Post partum</b>                                              | 113 (0.8)<br>14 (0.1)      | 683 (0.8)<br>39 (0.0)      | 1 (0.6)<br>0 (0.0)  | 0 (0.0)<br>0 (0.0)     | 2 (0.1)<br>2 (0.1)     | 24 (0.1)<br>0 (0.0)        | 15 (1.5)<br>1 (0.1)    | 130 (1.6)<br>6 (0.1)    | 16 (0.4)<br>0 (0.0)    | 94 (0.3)<br>12 (0.0)       |
| <b>Diabetes Mellitus</b>                                                      | 578 (4.0)                  | 3,004 (3.6)                | 4 (2.6)             | 24 (2.1)               | 268 (8.6)              | 1,739 (7.4)                | 38 (3.8)               | 345 (4.2)               | 242 (6.5)              | 1,286 (4.5)                |
| <b>Obesity</b>                                                                | 375 (2.6)                  | 1,875 (2.3)                | 3 (1.9)             | 21 (1.8)               | 118 (3.8)              | 822 (3.5)                  | 26 (2.6)               | 219 (2.6)               | 112 (3.0)              | 733 (2.5)                  |
| <b>Imunossupressio<br/>n</b>                                                  | 204 (1.4)                  | 1,144 (1.4)                | 2 (1.3)             | 15 (1.3)               | 62 (2.0)               | 394 (1.7)                  | 11 (1.1)               | 137 (1.7)               | 46 (1.2)               | 321 (1.1)                  |
| <b>Chronic Kidney<br/>Disease</b>                                             | 90 (0.6)                   | 446 (0.5)                  | 0 (0.0)             | 1 (0.1)                | 44 (1.4)               | 217 (0.9)                  | 7 (0.7)                | 53 (0.6)                | 35 (0.9)               | 203 (0.7)                  |
| <b>Cardiac Disease</b>                                                        | 1,091 (7.5)                | 6,128 (7.4)                | 17 (11.0)           | 37 (3.3)               | 444 (14.3)             | 3,141 (13.4)               | 74 (7.4)               | 628 (7.6)               | 426 (11.4)             | 2,616 (9.1)                |
| <b>Medical<br/>comorbidities</b>                                              |                            |                            |                     |                        |                        |                            |                        |                         |                        |                            |
| 0                                                                             | 12,734<br>(87.4)           | 73,257<br>(88.0)           | 133 (85.8)          | 1,062 (93.4)           | 2,430 (78.0)           | 18,601 (79.3)              | 870 (87.5)             | 7,184 (86.7)            | 3,104 (83.1)           | 24,860<br>(86.1)           |
| 1                                                                             | 1,418 (9.7)                | 7,834 (9.4)                | 19 (12.3)           | 55 (4.8)               | 480 (15.4)             | 3,616 (15.4)               | 103 (10.4)             | 846 (10.2)              | 439 (11.7)             | 3,009 (10.4)               |
| ≥2                                                                            | 414 (2.8)                  | 2,199 (2.6)                | 3 (1.9)             | 20 (1.8)               | 204 (6.6)              | 1,248 (5.3)                | 21 (2.1)               | 259 (3.1)               | 194 (5.2)              | 1,005 (3.5)                |
| <b>Days from first<br/>positive test to<br/>second test,<br/>median (IQR)</b> | 204 (138 – 273)            | 203 (142 – 269)            | 219 (154 – 332)     | 226 (159 – 325)        | 225 (157 – 320)        | 240 (165 – 325)            | 212 (150 – 308)        | 228 (162 – 324)         | 258 (179 – 334)        | 269 (193 – 339)            |

|                                                                  |                |                |                 |                 |                |                |                |                 |                |                 |
|------------------------------------------------------------------|----------------|----------------|-----------------|-----------------|----------------|----------------|----------------|-----------------|----------------|-----------------|
| <b>Hospitalized during 1st infection</b>                         | 401 (2.8)      | 3,274 (3.9)    | 7 (4.5)         | 54 (4.7)        | 147 (4.7)      | 1,361 (5.8)    | 43 (4.3)       | 389 (4.7)       | 183 (4.9)      | 1,429 (4.9)     |
| <b>Days, 1st vaccine dose to 2nd positive test, median (IQR)</b> | NA (NA – NA)   | NA (NA – NA)   | 179 (109 – 300) | 189 (112 – 288) | 164 (93 – 252) | 167 (97 – 249) | 162 (99 – 264) | 177 (113 – 277) | 172 (91 – 237) | 187 (100 – 243) |
| <b>Vaccination Status at test date</b>                           |                |                |                 |                 |                |                |                |                 |                |                 |
| Unvaccinated                                                     | 14,566 (100.0) | 83,290 (100.0) | —               | —               | —              | —              | —              | —               | —              | —               |
| One dose                                                         |                |                |                 |                 |                |                |                |                 |                |                 |
| 0-13                                                             | —              | —              | 29 (18.7)       | 164 (14.4)      | 413 (13.3)     | 2,138 (9.1)    | 192 (19.3)     | 1,288 (15.5)    | 303 (8.1)      | 1,804 (6.2)     |
| ≥14                                                              | —              | —              | 126 (81.3)      | 973 (85.6)      | 1,897 (60.9)   | 13,916 (59.3)  | 670 (67.4)     | 5,648 (68.1)    | 630 (16.9)     | 3,997 (13.8)    |
| Two doses                                                        |                |                |                 |                 |                |                |                |                 |                |                 |
| 0-13                                                             | —              | —              | —               | —               | 160 (5.1)      | 1,400 (6.0)    | 48 (4.8)       | 400 (4.8)       | 271 (7.3)      | 2,091 (7.2)     |
| ≥14                                                              | —              | —              | —               | —               | 644 (20.7)     | 6,011 (25.6)   | 84 (8.5)       | 953 (11.5)      | 2,533 (67.8)   | 20,982 (72.7)   |
| <b>Hospitalization (up to 28 days)</b>                           | 1,002 (6.9)    | 1,094 (1.3)    | 9 (5.8)         | 11 (1.0)        | 255 (8.2)      | 475 (2.0)      | 46 (4.6)       | 137 (1.7)       | 233 (6.2)      | 479 (1.7)       |
| <b>Death (up to 28 days)</b>                                     | 166 (1.1)      | 214 (0.3)      | 0 (0.0)         | 0 (0.0)         | 47 (1.5)       | 68 (0.3)       | 5 (0.5)        | 11 (0.1)        | 72 (1.9)       | 93 (0.3)        |
| <b>Hospitalization or Death</b>                                  | 1,011 (6.9)    | 1,123 (1.3)    | 9 (5.8)         | 11 (1.0)        | 257 (8.3)      | 478 (2.0)      | 47 (4.7)       | 137 (1.7)       | 240 (6.4)      | 489 (1.7)       |

**Table A2. Vaccine effectiveness among recently vaccinated individuals (0 to 6 days and 7 to 13 days post first dose).**

|                     | Symptomatic Disease   |               | Hospitalization or Death |                 |
|---------------------|-----------------------|---------------|--------------------------|-----------------|
|                     | Vaccine Effectiveness | 95% CI        | Vaccine Effectiveness    | 95% CI          |
| <b>Unvaccinated</b> | Ref                   | -             | Ref                      | -               |
| <b>BNT162b2</b>     |                       |               |                          |                 |
| 0-6 days            | -1.3%                 | -29.4 to 20.7 | -40.1%                   | -284.6 to 49    |
| 7-13 days           | 27.2%                 | 9.8 to 41.2   | 29.4                     | -73 to 71.2     |
| <b>ChAdOx1</b>      |                       |               |                          |                 |
| 0-6 days            | 13.9%                 | -2.9 to 27.9  | -4.7%                    | -92.4 to 37.8   |
| 7-13 days           | -25.5%                | -45.5 to -8.2 | -48.4%                   | -131.1 to 4.8   |
| <b>CoronaVac</b>    |                       |               |                          |                 |
| 0-6 days            | 21.0%                 | 2.3 to 36.1   | 8.7%                     | -77.0 to 52.9   |
| 7-13 days           | -9.6%                 | -29.4 to 7.2  | 1.6%                     | -76.9 to 45.3   |
| <b>Ad26.COV2.S</b>  |                       |               |                          |                 |
| 0-6 days            | 29.6%                 | -41.6 to 65.0 | -25.2%                   | -1817.7 to 91.8 |
| 7-13 days           | -2.2%                 | -71.6 to 39.1 | -14.8%                   | -1045.6 to 88.5 |

**Table A3. Vaccine effectiveness  $\geq 14$  days after series completion against symptomatic COVID-19 by subgroup.**

|                    | Vaccine waning<br>(time after series completion) |                       |         | Natural immunity waning<br>(time after first infection) |                      |         | Age                  |                      |         |
|--------------------|--------------------------------------------------|-----------------------|---------|---------------------------------------------------------|----------------------|---------|----------------------|----------------------|---------|
|                    | 14-90 days                                       | >90 days              | p-value | 91-180 days                                             | 181-613 days         | p-value | 18-49 years          | $\geq 50$ years      | p-value |
| <b>BNT162b2</b>    | 64.2%<br>(54.2-72.0)                             | 100%<br>(*)           | 0.277   | 35.3%<br>(-2.7-59.3)                                    | 70.7%<br>(61.1-77.9) | 0.011   | 64.6%<br>(53.0-73.3) | 66.9%<br>(46.0-79.7) | 0.891   |
| <b>ChAdOx1</b>     | 55.5%<br>(50.5-60.1)                             | 56.8%<br>(46.6-65.1)  | 0.544   | 47.0%<br>(32.7-58.3)                                    | 58.4%<br>(53.7-62.6) | 0.201   | 54.8%<br>(49.4-59.7) | 59.9%<br>(50.8-67.3) | 0.274   |
| <b>CoronaVac</b>   | 40.5%<br>(36.4-44.3)                             | 38.0%<br>(33.1-42.5)  | 0.760   | 31.6%<br>(24.1-38.4)                                    | 42.4%<br>(38.8-45.8) | 0.050   | 39.6%<br>(36.0-43.0) | 39.2%<br>(30.5-46.8) | 0.750   |
| <b>Ad26.COV2.S</b> | 46.1%<br>(32.7-56.7)                             | 30.6%<br>(-12.4-57.1) | 0.420   | 39.6%<br>(15.5-56.8)                                    | 46.0%<br>(31.2-57.7) | 0.832   | 41.0%<br>(27.8-52.4) | 67.0%<br>(29.0-84.7) | 0.142   |

**Table A4. Vaccine effectiveness  $\geq 14$  days after series completion against severe outcomes by subgroup.**

|                    | Vaccine waning<br>(time after series completion) |                        |         | Natural immunity waning<br>(time after first infection) |                       |         | Age                  |                         |         |
|--------------------|--------------------------------------------------|------------------------|---------|---------------------------------------------------------|-----------------------|---------|----------------------|-------------------------|---------|
|                    | 14-90 days                                       | >90 days               | p-value | 91-180 days                                             | 181-613 days          | p-value | 18-49 years          | $\geq 50$ years         | p-value |
| <b>BNT162b2</b>    | 88.8%<br>(50.0-97.5)                             | 100%<br>(*)            | 0.765   | 100%<br>(*)                                             | 88.5%<br>(48.3-97.4)  | 0.456   | 88.6%<br>(6.3-98.6)  | 89.8%<br>(17.0-98.7)    | 0.933   |
| <b>ChAdOx1</b>     | 86.6%<br>(77.6-92.0)                             | 95.1%<br>(84.8-98.4)   | 0.007   | 92.9%<br>(67.4-98.4)                                    | 90.0%<br>(83.3-94.0)  | 0.579   | 88.7%<br>(73.9-95.1) | 89.9%<br>(81.4-94.5)    | 0.776   |
| <b>CoronaVac</b>   | 86.6%<br>(79.8-90.3)                             | 74.4%<br>(63.3-82.2)   | 0.012   | 74.1%<br>(57.9-84.1)                                    | 84.10%<br>(78.4-88.4) | 0.118   | 84.9%<br>(76.6-90.3) | 79.2%<br>(69.7-85.7)    | 0.153   |
| <b>Ad26.COV2.S</b> | 60.2%<br>(-10.8-85.7)                            | 41.0%<br>(-240.9-89.9) | 0.978   | 6.9%<br>(-179.6-69.0)                                   | 81.8%<br>(17.1-96.0)  | 0.064   | 65.2%<br>(3.3-87.5)  | -32.3%<br>(-764.1-79.6) | 0.211   |

**Table A5- Estimates for covariates from models for estimating vaccine effectiveness.**

| Covariate                                                                | Symptomatic COVID-19 |                        | COVID-19 related hospitalisation or death |                           |
|--------------------------------------------------------------------------|----------------------|------------------------|-------------------------------------------|---------------------------|
|                                                                          |                      | Odds Ratio (95% CI)    |                                           | Odds Ratio (95% CI)       |
| <b>Days first infection to second test (first non-linear component)</b>  |                      | 0.9989 (0.9984-0.9993) |                                           | 0.9970 (0.9952- 0.9987)   |
| <b>Days first infection to second test (second non-linear component)</b> |                      | 1.0018 (1.0013-1.0024) |                                           | 1.0039 (1.0017- 1.0061)   |
| <b>Hospitalization (First infection)</b>                                 |                      | 0.7020 (0.6462-0.7626) |                                           | 0.7617 (0.6255- 0.9276)   |
| <b>Race</b>                                                              |                      |                        |                                           |                           |
|                                                                          | White                | Reference              |                                           | Reference                 |
|                                                                          | Mixed                | 0.9945 (0.9581-1.0323) |                                           | 0.9802 (0.8433- 1.1394)   |
|                                                                          | Black                | 0.9615 (0.8950-1.0330) |                                           | 0.9183 (0.7027- 1.2001)   |
|                                                                          | Indigenous/Asian     | 0.9970 (0.9333-1.0650) |                                           | 1.1995 (0.9124- 1.5769)   |
|                                                                          | (Missing)            | 1.1357 (1.0685-1.2070) |                                           | 0.9011 (0.6950- 1.1683)   |
| <b>Number of comorbidities</b>                                           |                      |                        |                                           |                           |
|                                                                          | None                 | Reference              |                                           | Reference                 |
|                                                                          | 1                    | 1.0146 (0.9655-1.0662) |                                           | 2.3401 (2.0154- 2.7170)   |
|                                                                          | ≥2                   | 1.1246 (1.0336-1.2236) |                                           | 4.2217 (3.4931- 5.1023)   |
| <b>Pregnancy (Yes)</b>                                                   |                      | 0.9817 (0.8164-1.1805) |                                           | 3.1823 (1.4896- 6.7986)   |
| <b>Postpartum period (Yes)</b>                                           |                      | 1.8559 (1.0344-3.3296) |                                           | 14.4189 (1.0368-200.5334) |
| <b>Age - continuous</b>                                                  |                      | Not included           |                                           | 1.0637 (1.0407- 1.0873)   |

**Table A6- Sensitivity analyses with different matching criteria\*. Vaccine effectiveness against symptomatic COVID-19**

| Vaccination status | Matching 1           | Matching 2            | Matching 3          | Matching 4          | Matching 5           |
|--------------------|----------------------|-----------------------|---------------------|---------------------|----------------------|
| <b>BNT162b2</b>    |                      |                       |                     |                     |                      |
| One dose           |                      |                       |                     |                     |                      |
| 0-13               | 14 (-2.4 to 27.8)    | 14.5 (0.6 to 26.4)    | 16.2 (1.2 to 28.9)  | 17.5 (2.3 to 30.4)  | 17.9 (1.8 to 31.4)   |
| ≥14                | 46.9 (41.1 to 52.1)  | 43.3 (38.1 to 48)     | 47.1 (41.7 to 52)   | 47.1 (41.5 to 52.1) | 46.4 (40.5 to 51.7)  |
| Two doses          |                      |                       |                     |                     |                      |
| 0-13               | 50.9 (30.3 to 65.4)  | 52.4 (35.5 to 64.8)   | 52.9 (35 to 65.9)   | 52.3 (33.7 to 65.7) | 51.3 (31.6 to 65.3)  |
| ≥14                | 66.8 (56.7 to 74.5)  | 60.8 (51.1 to 68.6)   | 64.7 (54.9 to 72.4) | 64.2 (54 to 72.2)   | 64.8 (54.6 to 72.7)  |
| <b>ChAdOx1</b>     |                      |                       |                     |                     |                      |
| One dose           |                      |                       |                     |                     |                      |
| 0-13               | -8 (-22.5 to 4.8)    | -10.4 (-22.2 to 0.3)  | -5.9 (-18.9 to 5.6) | -7 (-20.5 to 5.1)   | -5.1 (-19.3 to 7.5)  |
| ≥14                | 32.8 (28.2 to 37)    | 32.3 (28.6 to 35.9)   | 34 (29.9 to 37.9)   | 34 (29.7 to 38)     | 33 (28.4 to 37.3)    |
| Two doses          |                      |                       |                     |                     |                      |
| 0-13               | 45.6 (34.4 to 54.9)  | 46.3 (36.8 to 54.3)   | 47.2 (36.9 to 55.7) | 47.6 (37.2 to 56.3) | 48 (37.4 to 56.8)    |
| ≥14                | 56.4 (51.4 to 60.8)  | 54.4 (50.1 to 58.3)   | 56 (51.4 to 60.2)   | 55.6 (50.8 to 59.9) | 54.5 (49.4 to 59)    |
| <b>CoronaVac</b>   |                      |                       |                     |                     |                      |
| One dose           |                      |                       |                     |                     |                      |
| 0-13               | 7.1 (-7.5 to 19.6)   | 1.9 (-10.5 to 12.9)   | 3.7 (-10.1 to 15.7) | 2.4 (-12.1 to 15)   | 2.3 (-13.2 to 15.7)  |
| ≥14                | 19 (10.3 to 26.8)    | 16.1 (8.8 to 22.9)    | 18.9 (10.9 to 26.2) | 20.6 (12.6 to 27.9) | 15.9 (6.7 to 24.2)   |
| Two doses          |                      |                       |                     |                     |                      |
| 0-13               | 33 (22.1 to 42.4)    | 28.1 (18.6 to 36.6)   | 26.5 (15.6 to 36)   | 29.2 (18.4 to 38.6) | 26 (13.7 to 36.5)    |
| ≥14                | 39.5 (35.9 to 42.9)  | 39.1 (36 to 41.9)     | 39.4 (36 to 42.5)   | 39.6 (36.2 to 42.8) | 37.8 (34 to 41.3)    |
| <b>Ad26.COV2.S</b> |                      |                       |                     |                     |                      |
| One dose           |                      |                       |                     |                     |                      |
| 0-13               | 16.2 (-29.4 to 45.8) | -10.1 (-60.3 to 24.4) | 9.5 (-37.4 to 40.3) | 11 (-37 to 42.1)    | 10.8 (-39.3 to 42.9) |
| ≥14                | 42.8 (29 to 53.9)    | 38.2 (25.8 to 48.5)   | 43.9 (31.4 to 54.1) | 42.6 (29.5 to 53.3) | 41.2 (27.3 to 52.4)  |

\*Matching 1: ±5 days (sample collection date), ±5 years (age), exact matching: sex, city. 1:10 with replacement  
 Matching 2: ±20 days (sample collection date), ±10 years (age), exact matching: sex, city. 1:10 with replacement  
 Matching 3: ±10 days (sample collection date), ±5 years (age), exact matching: sex, city. 1:10 with replacement. Removed control tests of cases individuals  
 Matching 4: ±10 days (sample collection date), ±5 years (age), exact matching: sex, city. 1:5 with replacement  
 Matching 5: ±10 days (sample collection date), ±5 years (age), exact matching: sex, city. 1:5 without replacement



**Table A7- Sensitivity analyses with different matching criteria\*. Vaccine effectiveness against COVID-19 related hospitalisation or death**

| Vaccination status | Matching 1             | Matching 2            | Matching 3             | Matching 4            | Matching 5           |
|--------------------|------------------------|-----------------------|------------------------|-----------------------|----------------------|
| <b>BNT162b2</b>    |                        |                       |                        |                       |                      |
| <b>One dose</b>    |                        |                       |                        |                       |                      |
| 0-13               | 9.9 (-80 to 54.9)      | 30.7 (-28.4 to 62.6)  | 2.9 (-90.9 to 50.6)    | 14.8 (-74.6 to 58.4)  | 21.3 (-63.7 to 62.1) |
| ≥14                | 64.8 (44.1 to 77.8)    | 64.6 (46.9 to 76.3)   | 62.2 (41.5 to 75.6)    | 61.2 (38.9 to 75.4)   | 66.5 (46.7 to 79)    |
| <b>Two doses</b>   |                        |                       |                        |                       |                      |
| 0-13               | 100 (†)                | 100 (†)               | 100 (†)                | 100 (†)               | 100 (†)              |
| ≥14                | 89 (50.7 to 97.6)      | 90 (57 to 97.7)       | 89.7 (54 to 97.7)      | 86.5 (36 to 97.2)     | 89.1 (48.6 to 97.7)  |
| <b>ChAdOx1</b>     |                        |                       |                        |                       |                      |
| <b>One dose</b>    |                        |                       |                        |                       |                      |
| 0-13               | -16 (-73.9 to 22.6)    | -38.5 (-87.4 to -2.4) | -32.9 (-91 to 7.5)     | -29.3 (-90.2 to 12.1) | -36.2 (-103.9 to 9)  |
| ≥14                | 61.5 (49.8 to 70.4)    | 61.3 (52.4 to 68.6)   | 57.2 (45.5 to 66.4)    | 57.3 (45.2 to 66.7)   | 58.5 (45.4 to 68.4)  |
| <b>Two doses</b>   |                        |                       |                        |                       |                      |
| 0-13               | 71.4 (39.5 to 86.5)    | 73.7 (50.7 to 86)     | 71.7 (43.4 to 85.8)    | 74.2 (47 to 87.4)     | 72.3 (39.5 to 87.3)  |
| ≥14                | 91.4 (85 to 95.1)      | 88.7 (82.7 to 92.6)   | 89.9 (83.5 to 93.8)    | 89.1 (82 to 93.4)     | 91 (84.7 to 94.7)    |
| <b>CoronaVac</b>   |                        |                       |                        |                       |                      |
| <b>One dose</b>    |                        |                       |                        |                       |                      |
| 0-13               | 5.5 (-56.9 to 43)      | 10.8 (-33.4 to 40.3)  | 3.3 (-52.4 to 38.6)    | 2.1 (-57.6 to 39.1)   | -8.8 (-88.6 to 37.3) |
| ≥14                | 47 (22.3 to 63.8)      | 30.4 (7.6 to 47.5)    | 36.2 (9.4 to 55.1)     | 37.4 (10 to 56.5)     | 32.5 (-1.9 to 55.2)  |
| <b>Two doses</b>   |                        |                       |                        |                       |                      |
| 0-13               | 72.5 (47.7 to 85.6)    | 56.7 (31.9 to 72.5)   | 61 (32.4 to 77.5)      | 65 (39.7 to 79.7)     | 63.6 (31.8 to 80.5)  |
| ≥14                | 83.3 (77.3 to 87.7)    | 78.8 (73.5 to 83.1)   | 81.4 (75.4 to 85.9)    | 80.8 (74.6 to 85.5)   | 81.9 (75.5 to 86.7)  |
| <b>Ad26.COV2.S</b> |                        |                       |                        |                       |                      |
| <b>One dose</b>    |                        |                       |                        |                       |                      |
| 0-13               | -37.2 (-791.4 to 78.9) | -43.3 (-783 to 76.7)  | -14.2 (-571.7 to 80.6) | 6 (-530.6 to 86)      | 0 (-516.9 to 83.8)   |
| ≥14                | 59.7 (-0.3 to 83.8)    | 55.2 (3.4 to 79.2)    | 58.7 (-0.4 to 83)      | 59.8 (-0.8 to 83.9)   | 62.8 (7.3 to 85.1)   |

\*Matching 1: ±5 days (sample collection date), ±5 years (age), exact matching: sex, city. 1:10 with replacement  
 Matching 2: ±20 days (sample collection date), ±10 years (age), exact matching: sex, city. 1:10 with replacement  
 Matching 3: ±10 days (sample collection date), ±5 years (age), exact matching: sex, city. 1:10 with replacement. Removed control tests of cases individuals  
 Matching 4: ±10 days (sample collection date), ±5 years (age), exact matching: sex, city. 1:5 with replacement  
 Matching 5: ±10 days (sample collection date), ±5 years (age), exact matching: sex, city. 1:5 without replacement

† Confidence interval could not be estimated due to zero events in the group



Figure A1 Cumulative proportion of the population receiving each vaccine, by age group.

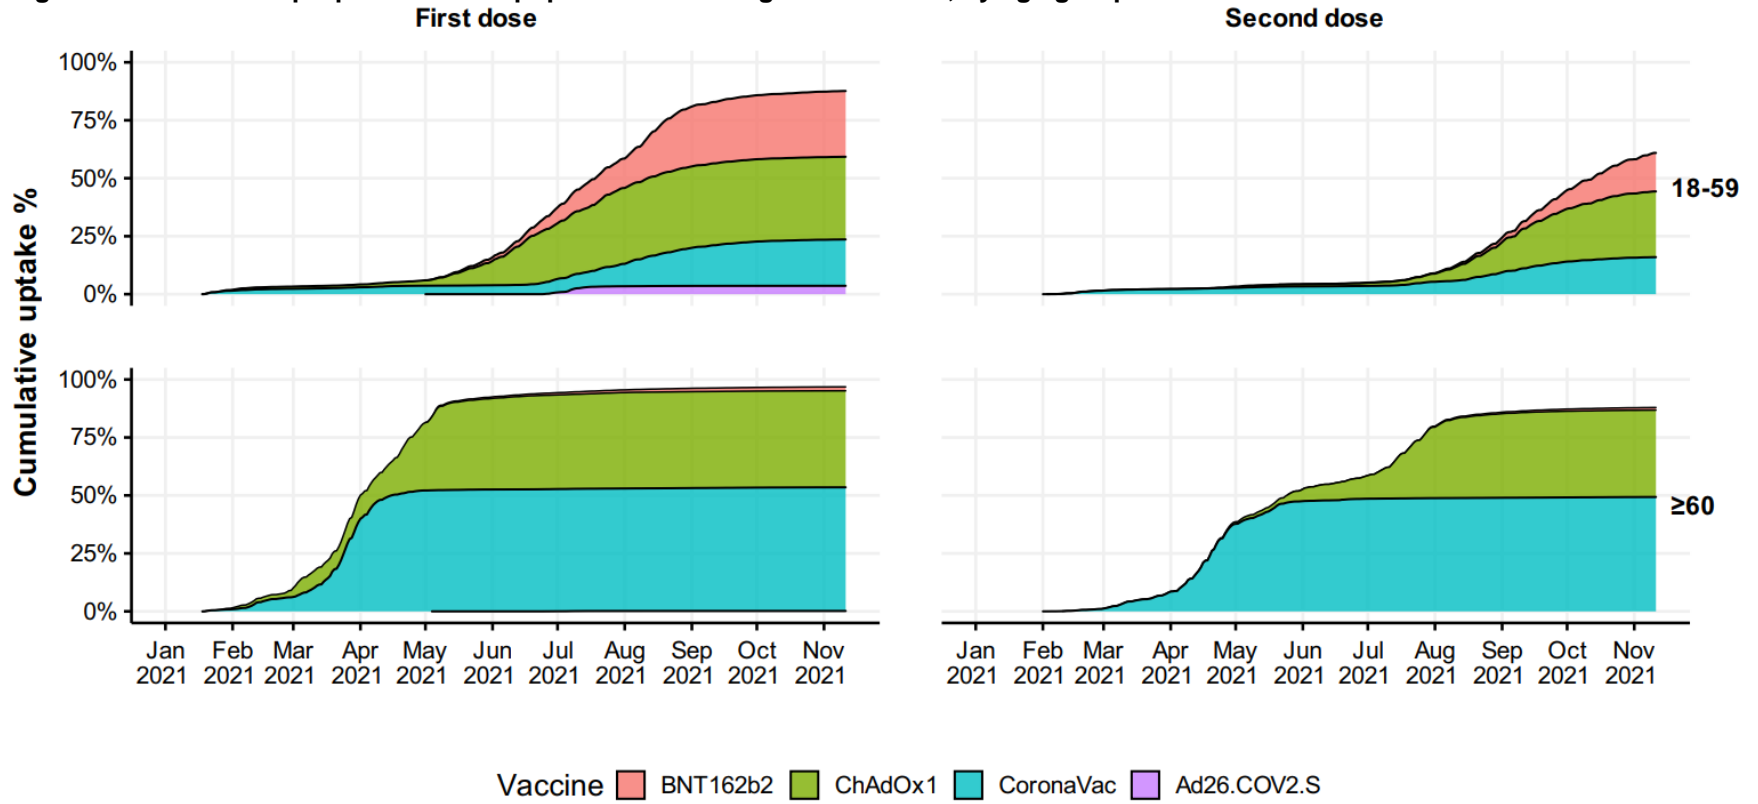

**Figure A2. Prevalence of SARS-CoV-2 variants of concern in Brazil from January 01, 2021, to November, 30, 2021, stratified by region. Data obtained from the Fiocruz Genomic Network and GISAID.**

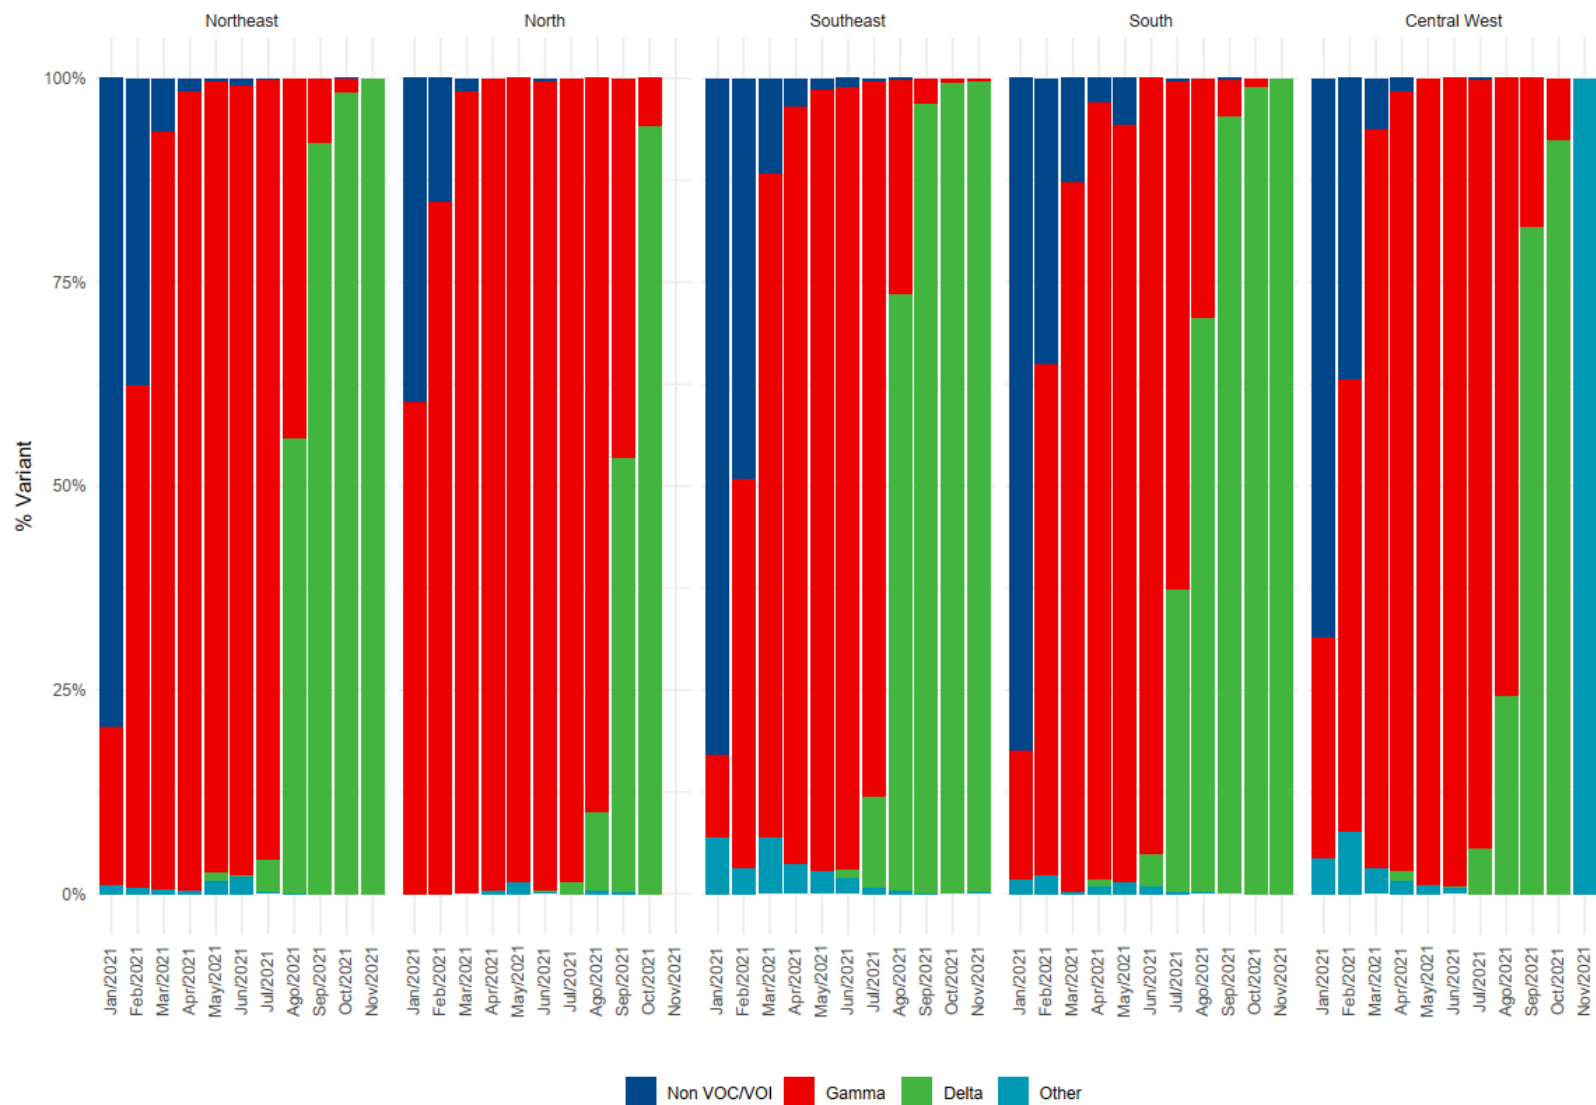

**Figure A3. Time elapsed between the first (gray) or second (orange) dose and RT-PCR test among vaccinated people who had a prior SARS-CoV-2 infection. A dashed line is shown at 90 days.**

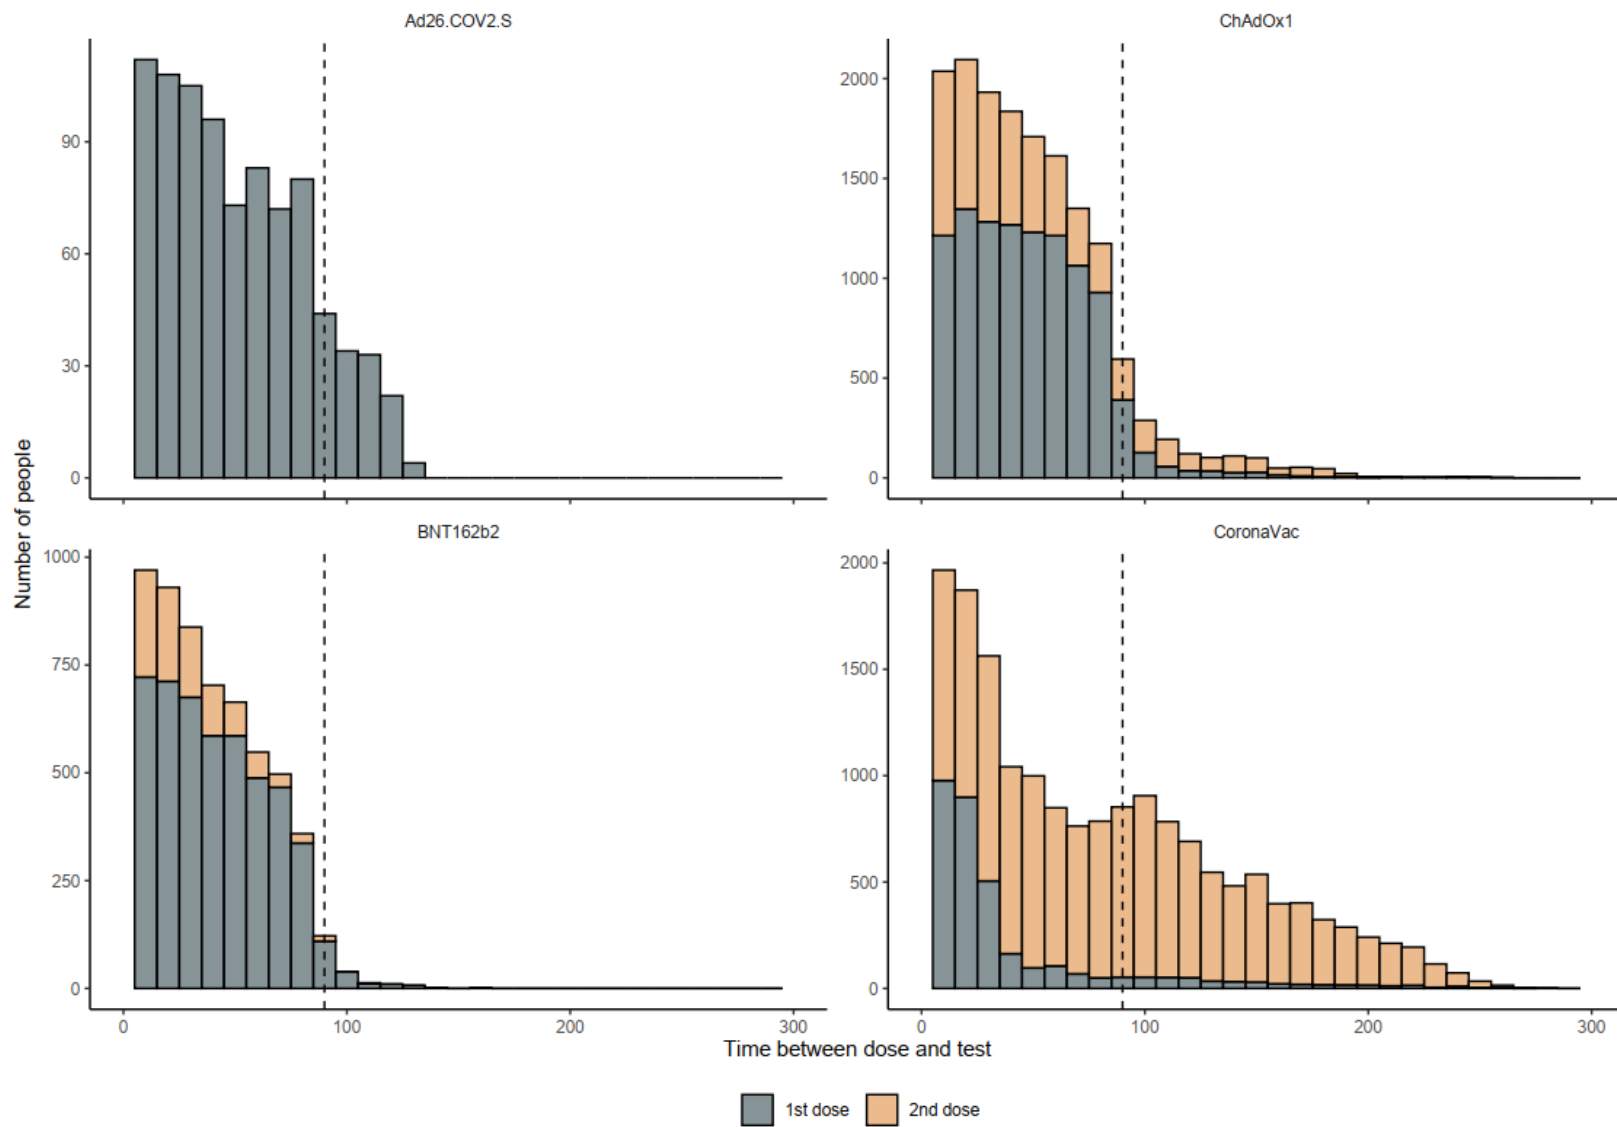

Figure A4. Number of enrolled discordant case-control pairs by date of RT-PCR testing during the study period between January 18 and November 11, 2021.

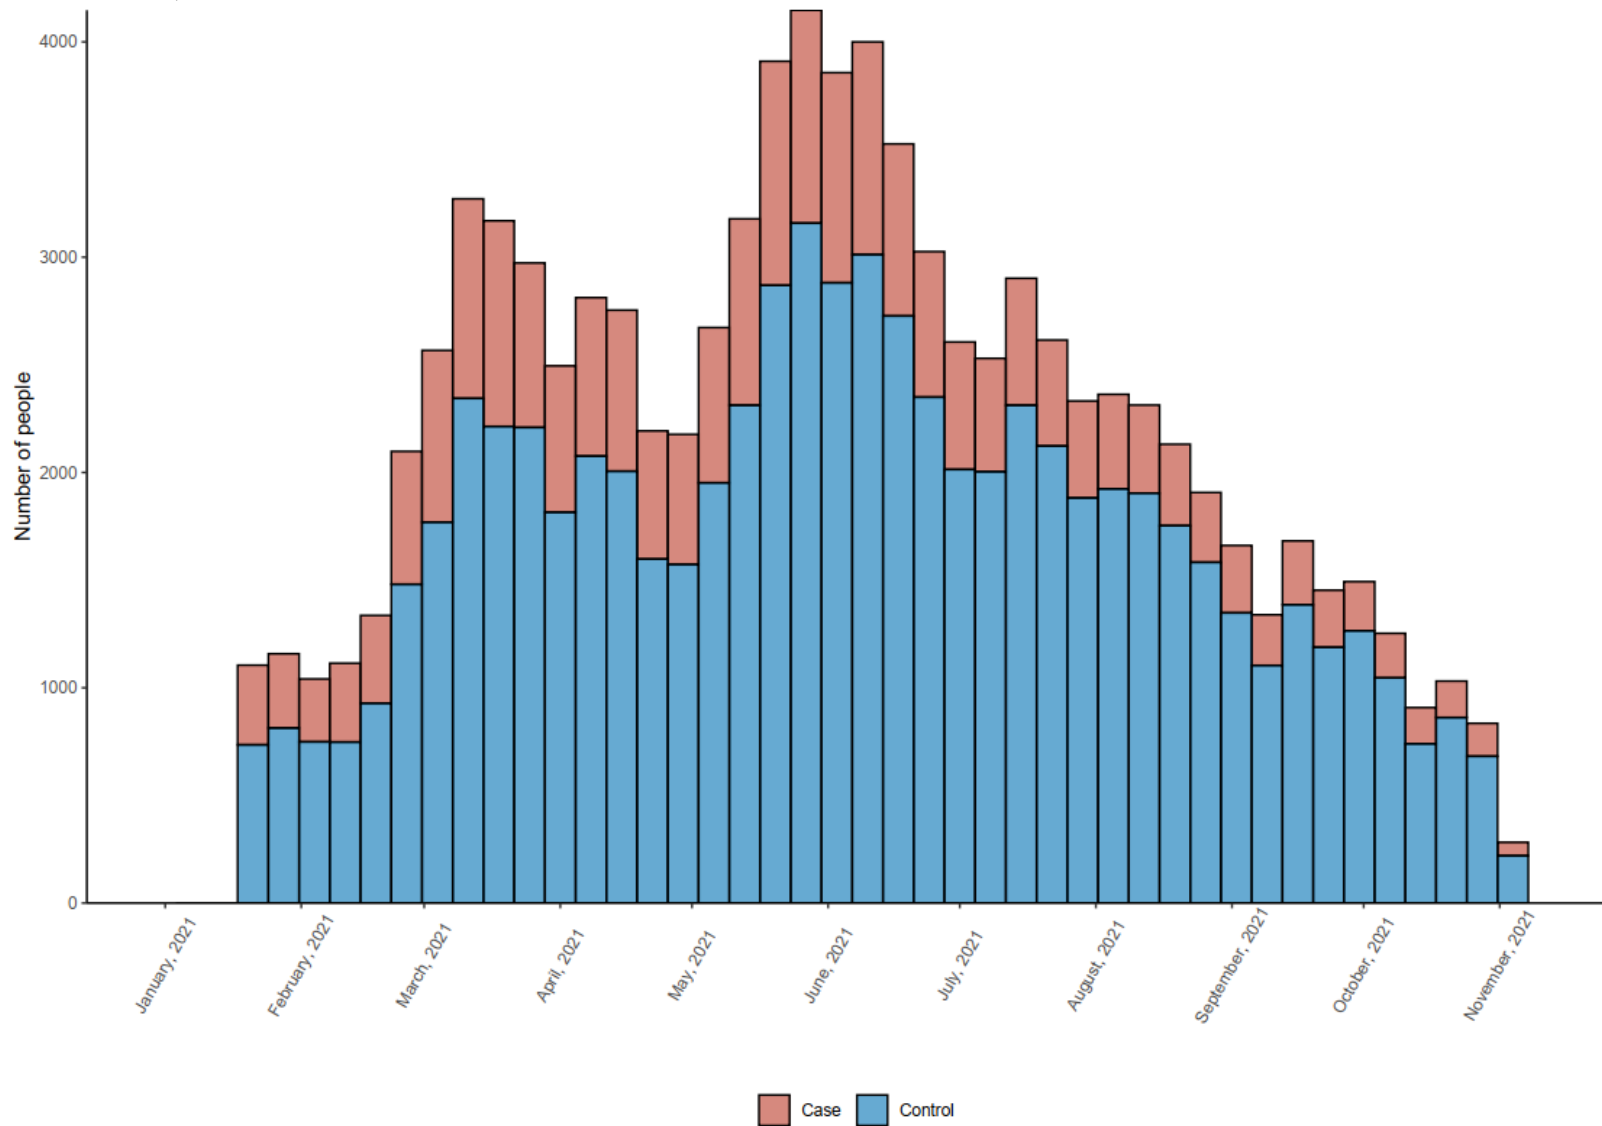

**Figure A5. Week of vaccination for AD26.COV2.S, ChAdOx1, BNT162b2 and CoronaVac among matched participants.**

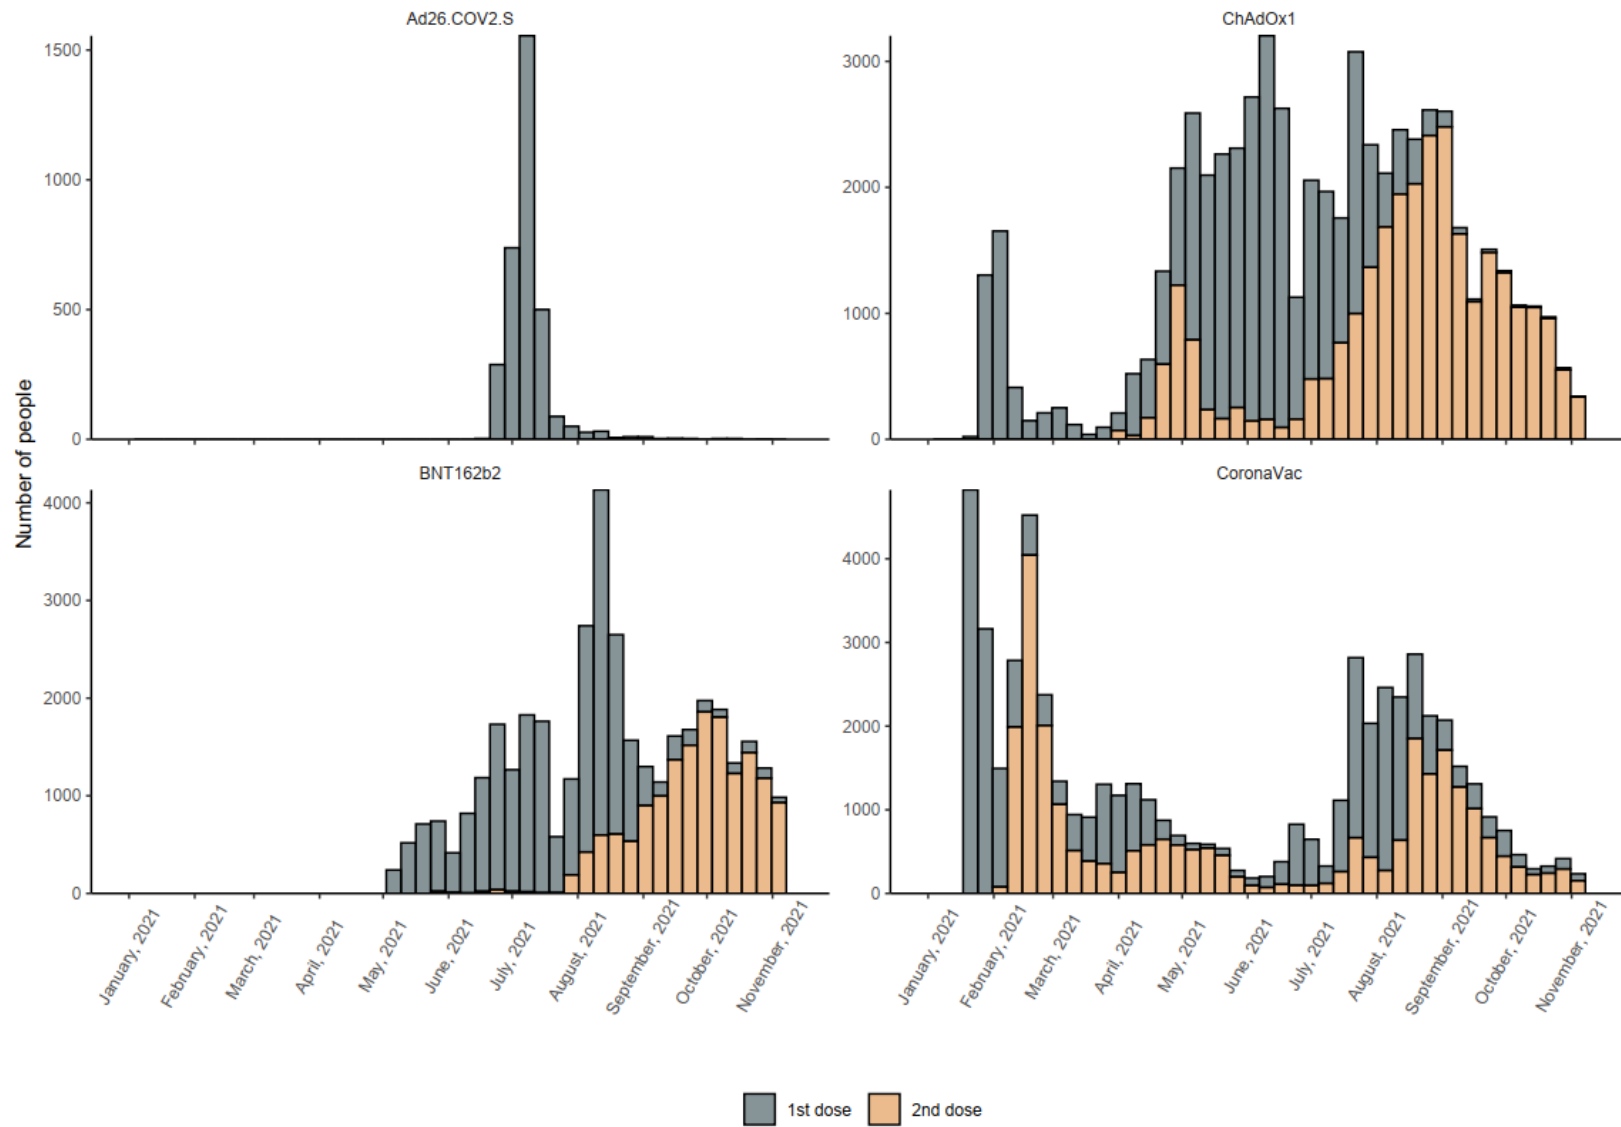

## **Supplementary Information on Data Sources and Linkage**

### **Data Sources**

The Brazilian Ministry of Health Department of Informatics (DATASUS) provided unidentified datasets on the COVID-19 Vaccination Campaign (SI-PNI), Suspected Cases of Acute Respiratory Infection (e-SUS-Notifica), and Severe Acute Respiratory Infection/Illness (SIVEP-Gripe). A key-coded individual identification number present in each of the three datasets (paciente\_id) was used to perform deterministic linkage, and then removed from the resulting dataset used in our analyses. No personally identifiable data was accessed at any stage. These sources have been used before separately (1 - 4), linked to other data (5 - 7) and linked among them (8 - 9). Additional and updated details follow.

SIVEP-Gripe, the national system for the registry of SARI (Severe Acute Respiratory Infection/Illness)-related hospitalisations and deaths created during the H1N1 pandemic in 2009, has also been used as a source for epidemiological studies (1,2). All COVID-19 related SARI hospitalisations and deaths (regardless of prior hospitalisation) are registered in this system. 2,054,000 cases were reported for 2020 and 2021 in the study database.

e-SUS-Notifica, is a nationwide online health surveillance information system for registering acute respiratory infections and suspected/confirmed cases of COVID-19. It has been used as a data source for epidemiological research before (3) and is the official source of information about COVID-19 infections. 59.6 million cases were reported in the study database.

SI-PNI is a data warehouse containing information on all vaccine doses administered by Brazilian public health services. Brazil has a large experience in national immunizations (4) and this data source has been widely used for research (5-7). All COVID-19 immunisations in Brazil are recorded in this database. The Ministry of Health (MoH) obtained all vaccine doses used in Brazil and offered them free to the population. Some vaccination sites were located in private institutions, but received the doses from the MoH; these private sites were required to use the national unified reporting system. We expect less than 0.5% of the study population to have been vaccinated outside of Brazil. 353 million COVID-19 doses were administered in Brazil and recorded in the study database.

Open versions of all datasets have been made available at: <https://opendatasus.saude.gov.br>.

### **Linkage**

Records regarding the same person were identified in the database by a unique variable (paciente\_id) provided by DATASUS, based on the official national identification numbers of the individual in Brazil, CPF and CNS. The taxpayer number (CPF) was established in 1968, and National Health System Number (CNS) was established in 2002 to include non-taxpayers in public health databases.



CNS collects information about full name, social name, mothers name, fathers name, gender, place of birth (city, state/province and country) date of birth, Brazilian indigenous ethnicity. We used patient\_id as a deterministic key to link the records.

Over 99.9% of immunization records had valid information for date of birth, sex, municipality of residence and attending healthcare facility. To test the record consistency we tested the matching of three key variables for the people that were successfully linked with any other dataset, totalling 35.5 million records. The matching was of 97% for gender, 95% for place of birth (State) and 96% date of birth.

The Brazilian population in 2021 is estimated at 213.4 million individuals, 177 million of them are over 12 years old. We have identified 158.5 million individuals with at least one vaccine dose - 89.5% of the eligible population. This is compatible with the pace of the immunization campaign up to the study ending date - November 11th, 2021.

The flowchart of the linkage process is presented below

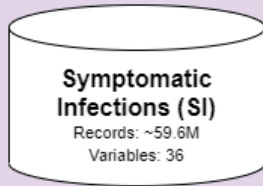

Rules applied to the records of the same person:

- The five most recent records, by register date, were considered.
- If two or more records were registered on the same day, the one with least null values on variables was considered.
- Data were transposed from long to wide, one line for each person, 3 sets of collums corresponding to each selected symptomatic infection event
- Results: ~41.4 million people had symptomatic infections in the period of the study

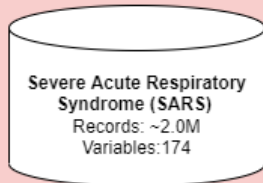

Rules applied to the records of the same person:

- The most recent two record of SARS were considered
- If two or more records were registered on the same day, the one with least null values on variables were considered.
- Results: 1.9 million people that had SARS in 2020 and 2021 were identified

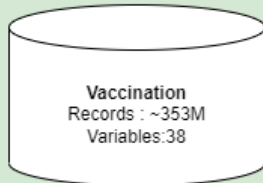

Rules applied to the records of the same person:

- Duplicate vaccines administered to the same individual in the same day and healthcare facility were removed. The most recently updated record was considered
- Dataset remodeled from long to wide, considering the first dose record and up to one second dose record. Participantes with more than 3 doses were not included
- Total Vacinees: ~158.5M

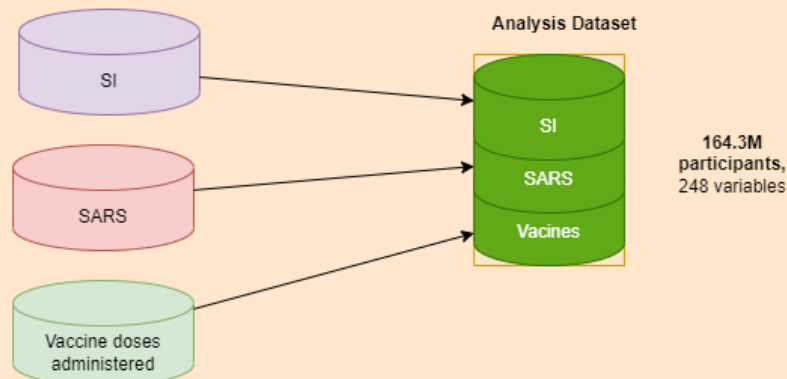

## References

1. Ranzani OT, Bastos LSL, Gelli JGM, Marchesi JF, Baião F, Hamacher S, et al. Characterisation of the first 250,000 hospital admissions for COVID-19 in Brazil: a retrospective analysis of nationwide data. *Lancet Respir Med*. 2021 Apr;9(4):407–18
2. Oliveira EA, Colosimo EA, Simões E Silva AC, Mak RH, Martelli DB, Silva LR, et al. Clinical characteristics and risk factors for death among hospitalised children and adolescents with COVID-19 in Brazil: an analysis of a nationwide database. *Lancet Child Adolesc Health*. 2021 Aug;5(8):559–68.
3. Lima FET, Albuquerque NLS, Florencio SSG, et al. Time interval between onset of symptoms and COVID-19 testing in Brazilian state capitals, August 2020. *Epidemiol Serv Saude*. 2020; 30e2020788
4. Domingues CMAS, Teixeira AM da S. Coberturas vacinais e doenças imunopreveníveis no Brasil no período 1982-2012: avanços e desafios do Programa Nacional de Imunizações. *Epidemiologia e Serviços de Saúde* 2013; 22: 9–27.
5. Vitral CL, Souto FJD, Gaspar AMC. Changing epidemiology of hepatitis A in Brazil: reassessing immunization policy. *Journal of Viral Hepatitis* 2008; 15: 22–5.
6. Carmo GMI do, Yen C, Cortes J, et al. Decline in Diarrhea Mortality and Admissions after Routine Childhood Rotavirus Immunization in Brazil: A Time-Series Analysis. *PLOS Medicine* 2011; 8: e1001024.
7. Andrade AL, Minamisava R, Tomich LM, et al. Impact of meningococcal C conjugate vaccination four years after introduction of routine childhood immunization in Brazil. *Vaccine* 2017; 35: 2025–33.
8. Ranzani OT, Hitchings MDT, Dorion M, D'Agostini TL, de Paula RC, de Paula OFP, et al. Effectiveness of the CoronaVac vaccine in older adults during a gamma variant associated epidemic of covid-19 in Brazil: test negative case-control study. *BMJ*. 2021 Aug 20;374:n2015.
9. Cerqueira-Silva T, Oliveira V de A, Boaventura VS, Pescarini JM, Júnior JB, Machado TM, et al. Influence of age on the effectiveness and duration of protection of Vaxzevria and CoronaVac vaccines: A population-based study. *Lancet Reg Health Am*. 2022 Feb;6:100154.
10. Katikireddi SV, Cerqueira-Silva T, Vasileiou E, Robertson C, Amele S, Pan J, et al. Two-dose ChAdOx1 nCoV-19 vaccine protection against COVID-19 hospital admissions and deaths over time: a retrospective, population-based cohort study in Scotland and Brazil. *Lancet*. 2022 Jan 1;399(10319):25–35.
